# Supplementary material for: Expanding PROTACtable genome universe of E3 ligases
Source: PubMed Central journal article supplement (PMC10579327; doi:10.1038/s41467-023-42233-2), 2023-10-16
Supplement: 41467_2023_42233_MOESM4_ESM.pdf [file 41467_2023_42233_MOESM4_ESM.pdf]

## **Description of Additional Supplementary Files**

File Name: Supplementary Data 1.xlsx

Description: Collected E3 ligases from three distinct sources
